# Supplementary material for: Online queries as a criterion for evaluation of the epidemiological status and effectiveness of COVID-19 epidemic control measures
Source: bioRxiv or medRxiv preprint supplement (doi:10.1101/2021.07.11.21260148), 2021-07-14
Supplement: Supplementary file [file media-1.pdf]

**Supplementary Table 1. Statistics of smell-related queries in Russia**

| Region of the Russian Federation | Population. people | Total (new cases) | Maximum per week (new cases) | Total (queries) | Maximum per week (queries) | Queries/people |
|----------------------------------|--------------------|-------------------|------------------------------|-----------------|----------------------------|----------------|
| Altai Territory                  | 2 296 773          | 15954             | 1252                         | 98146           | 11064                      | 0.04           |
| Amur Region                      | 781 850            | 20511             | 1165                         | 29495           | 2562                       | 0.04           |
| Arkhangelsk Region               | 1 128 099          | 34158             | 1593                         | 53708           | 3032                       | 0.05           |
| Astrakhan Region                 | 997 685            | 27008             | 1297                         | 38105           | 1954                       | 0.04           |
| Belgorod Region                  | 1 543 087          | 30201             | 1304                         | 81706           | 7359                       | 0.05           |
| Bryansk Region                   | 1 183 228          | 31714             | 1411                         | 76022           | 5101                       | 0.06           |
| Vladimir Region                  | 1 343 194          | 25969             | 1307                         | 96504           | 5417                       | 0.07           |
| Volgograd Region                 | 2 476 100          | 47180             | 1927                         | 123163          | 9252                       | 0.05           |
| Vologda Region                   | 1 151 751          | 47180             | 1927                         | 62594           | 4790                       | 0.05           |
| Voronezh Region                  | 2 307 100          | 64411             | 2736                         | 143372          | 11045                      | 0.06           |
| Jewish Autonomous Region         | 156 492            | 4281              | 322                          | 4419            | 387                        | 0.03           |
| Trans-Baikal Territory           | 1 054 071          | 37341             | 1876                         | 39475           | 3345                       | 0.04           |
| Ivanovo Region                   | 987 694            | 29393             | 1317                         | 53471           | 3798                       | 0.05           |
| Irkutsk Region                   | 2 375 640          | 53018             | 1933                         | 116682          | 13497                      | 0.05           |
| Kabardino-Balkarian Republic     | 870 197            | 20178             | 713                          | 21299           | 885                        | 0.02           |
| Kaliningrad Region               | 1 019 601          | 26900             | 1523                         | 38943           | 2918                       | 0.04           |
| Kaluga Region                    | 1 000 604          | 28473             | 1199                         | 68360           | 4446                       | 0.07           |
| Kamchatka Territory              | 311 985            | 13106             | 571                          | 12779           | 710                        | 0.04           |
| Karachay-Cherkess Republic       | 465 592            | 18568             | 675                          | 7982            | 392                        | 0.02           |
| Kemerovo Region                  | 2 634 376          | 30891             | 1377                         | 122241          | 12347                      | 0.05           |
| Kirov Region                     | 1 251 182          | 35041             | 1753                         | 71534           | 4285                       | 0.06           |
| Kostroma Region                  | 628 972            | 1202              | 100                          | 35937           | 3011                       | 0.06           |
| Krasnodar Territory              | 5 689 538          | 36679             | 1378                         | 287423          | 16303                      | 0.05           |
| Krasnoyarsk Territory            | 2 857 567          | 60689             | 2354                         | 151088          | 13673                      | 0.05           |
| Republic of Crimea               | 1 903 707          | 34772             | 2466                         | 94285           | 6413                       | 0.05           |
| Kurgan Region                    | 819 299            | 16787             | 758                          | 33160           | 3109                       | 0.04           |

|                             |            |        |       |         |       |      |
|-----------------------------|------------|--------|-------|---------|-------|------|
| Kursk Region                | 1 098 361  | 16787  | 758   | 68311   | 4685  | 0.06 |
| Leningrad Region            | 1 894 038  | 34158  | 1593  | 96979   | 5217  | 0.05 |
| Lipetsk Region              | 1 128 181  | 23352  | 1168  | 72541   | 5308  | 0.06 |
| Magadan Region              | 138 991    | 13106  | 571   | 4488    | 338   | 0.03 |
| Moscow                      | 12 636 312 | 960652 | 50304 | 1326923 | 58136 | 0.11 |
| Moscow Region               | 7 713 326  | 206936 | 10919 | 638954  | 30305 | 0.08 |
| Murmansk Region             | 733 158    | 45650  | 2006  | 40040   | 2212  | 0.05 |
| Nenets Autonomous District  | 44 404     | 989    | 63    | 1953    | 213   | 0.04 |
| Nizhny Novgorod Region      | 3 177 816  | 92136  | 3509  | 295507  | 15834 | 0.09 |
| Novgorod Region             | 593 232    | 26185  | 1472  | 32214   | 2378  | 0.05 |
| Novosibirsk Region          | 2 786 412  | 34437  | 1262  | 214460  | 20406 | 0.08 |
| Omsk Region                 | 1 904 294  | 39799  | 1776  | 101265  | 7793  | 0.05 |
| Orenburg Region             | 1 945 307  | 36509  | 1328  | 100097  | 8077  | 0.05 |
| Oryol Region                | 725 725    | 29213  | 1260  | 52590   | 3213  | 0.07 |
| Penza Region                | 1 292 211  | 36276  | 1598  | 86159   | 5127  | 0.07 |
| Perm Territory              | 2 580 639  | 44389  | 2323  | 135767  | 9914  | 0.05 |
| Primorsky Territory         | 1 879 486  | 39248  | 1682  | 74032   | 5671  | 0.04 |
| Pskov Region                | 621 028    | 30923  | 2889  | 31816   | 2789  | 0.05 |
| Republic of Adygea          | 463 091    | 13615  | 702   | 12929   | 958   | 0.03 |
| Republic of Altai           | 221 050    | 41949  | 1649  | 7086    | 690   | 0.03 |
| Republic of Bashkortostan   | 4 016 481  | 26994  | 1177  | 202409  | 12978 | 0.05 |
| Republic of Buryatia        | 986 132    | 32498  | 1902  | 31214   | 3475  | 0.03 |
| Republic of Dagestan        | 3 132 368  | 18568  | 675   | 42914   | 4646  | 0.01 |
| Republic of Ingushetia      | 515 970    | 14517  | 620   | 6036    | 618   | 0.01 |
| Republic of Kalmykia        | 270 139    | 18509  | 747   | 8201    | 496   | 0.03 |
| Republic of Karelia         | 609 439    | 39217  | 3176  | 30348   | 2628  | 0.05 |
| Komi Republic               | 813 859    | 38541  | 2123  | 40381   | 2982  | 0.05 |
| Mari El Republic            | 676 184    | 11385  | 373   | 27274   | 1432  | 0.04 |
| Republic of Mordovia        | 779 753    | 17207  | 627   | 52523   | 3078  | 0.07 |
| Republic of Sakha (Yakutia) | 984 703    | 32017  | 1559  | 23475   | 1550  | 0.02 |

|                                  |           |        |       |        |       |      |
|----------------------------------|-----------|--------|-------|--------|-------|------|
| Republic of North Ossetia-Alania | 693 449   | 15322  | 642   | 22308  | 1284  | 0.03 |
| Republic of Tatarstan            | 3 894 507 | 17367  | 716   | 215640 | 12905 | 0.06 |
| Republic of Tyva                 | 330 327   | 15596  | 950   | 6448   | 360   | 0.02 |
| Republic of Khakassia            | 532 266   | 21060  | 1267  | 23472  | 2345  | 0.04 |
| Rostov Region                    | 4 185 233 | 69683  | 2750  | 209825 | 15327 | 0.05 |
| Ryazan Region                    | 1 098 998 | 29213  | 1260  | 80771  | 4832  | 0.07 |
| Samara Region                    | 3 155 390 | 45398  | 2145  | 220062 | 15226 | 0.07 |
| St. Petersburg                   | 5 388 759 | 356376 | 26333 | 553274 | 28169 | 0.10 |
| Saratov Region                   | 2 396 961 | 47197  | 1892  | 134832 | 10076 | 0.06 |
| Sakhalin Region                  | 485 627   | 20959  | 1028  | 16605  | 994   | 0.03 |
| Sverdlovsk Region                | 4 291 886 | 75487  | 2834  | 347030 | 23788 | 0.08 |
| Sevastopol                       | 513 149   | 11215  | 698   | 20795  | 1899  | 0.04 |
| Smolensk Region                  | 921 620   | 25150  | 1300  | 52606  | 3183  | 0.06 |
| Stavropol Territory              | 2 794 625 | 46038  | 1713  | 110376 | 5412  | 0.04 |
| Tambov Region                    | 995 761   | 24904  | 1123  | 57875  | 3683  | 0.06 |
| Tver Region                      | 1 246 759 | 32079  | 1652  | 75080  | 4644  | 0.06 |
| Tomsk Region                     | 1 070 544 | 29619  | 1472  | 41029  | 3957  | 0.04 |
| Tula Region                      | 1 450 675 | 31603  | 1452  | 100600 | 5808  | 0.07 |
| Tyumen Region                    | 3 778 024 | 75487  | 2834  | 77417  | 6059  | 0.02 |
| Republic of Udmurtia             | 1 493 700 | 27195  | 1530  | 68232  | 5123  | 0.05 |
| Ulyanovsk Region                 | 1 219 240 | 46401  | 2014  | 72381  | 4153  | 0.06 |
| Khabarovsk Territory             | 1 302 918 | 47876  | 2394  | 53758  | 3904  | 0.04 |
| Khanty-Mansi Autonomous Area     | 1 688 378 | 50091  | 2116  | 92091  | 6514  | 0.05 |
| Chelyabinsk Region               | 3 444 025 | 48371  | 2176  | 200202 | 16099 | 0.06 |
| Chechen Republic                 | 1 500 490 | 11167  | 995   | 9972   | 379   | 0.01 |
| Chuvash Republic                 | 1 208 806 | 20787  | 902   | 62011  | 3077  | 0.05 |
| Chukotka Autonomous District     | 49 300    | 672    | 52    | 1174   | 80    | 0.02 |
| Yamal-Nenets Autonomous District | 547 111   | 36620  | 1399  | 29068  | 2126  | 0.05 |
| Yaroslavl Region                 | 1 242 356 | 31111  | 1334  | 88558  | 6221  | 0.07 |
