# Supplementary material for: Online queries as a criterion for evaluation of the epidemiological status and effectiveness of COVID-19 epidemic control measures
Source: bioRxiv or medRxiv preprint supplement (doi:10.1101/2021.07.11.21260148), 2021-07-14
Supplement: Supplementary file [file media-2.pdf]

**Supplementary Table 2. The correlation between the number of queries and new cases of COVID-19 in Russia**

| Region of Russian Federation | Correlations | p-value | Region                     | Correlations | p-value | Region                | Correlations | p-value |
|------------------------------|--------------|---------|----------------------------|--------------|---------|-----------------------|--------------|---------|
| Altai Territory              | 0.8          | 0.0000  | Magadan Region             | 0.5          | 0.0000  | Republic of Tyva      | 0.8          | 0.0000  |
| Amur Region                  | 0.8          | 0.0103  | Moscow                     | 1.0          | 0.0000  | Republic of Khakassia | 0.7          | 0.4478  |
| Arkhangelsk Region           | 0.7          | 0.0000  | Moscow Region              | 0.7          | 0.0000  | Rostov Region         | 0.6          | 0.0000  |
| Astrakhan Region             | 0.3          | 0.0019  | Murmansk Region            | 0.8          | 0.0256  | Ryazan Region         | 0.7          | 0.0000  |
| Belgorod Region              | 0.3          | 0.0000  | Nenets Autonomous District | 0.6          | 0.0011  | Samara Region         | 0.3          | 0.0000  |
| Bryansk Region               | 0.7          | 0.0000  | Nizhny Novgorod Region     | 0.7          | 0.0000  | St. Petersburg        | 0.7          | 0.0000  |
| Vladimir Region              | 0.6          | 0.0000  | Novgorod Region            | 0.8          | 0.0242  | Saratov Region        | 0.5          | 0.0000  |
| Volgograd Region             | 0.5          | 0.0000  | Novosibirsk Region         | 0.6          | 0.0000  | Sakhalin Region       | 0.8          | 0.0064  |
| Vologda Region               | 0.7          | 0.0530  | Omsk Region                | 0.5          | 0.0000  | Sverdlovsk Region     | 0.6          | 0.0000  |
| Voronezh Region              | 0.5          | 0.0000  | Orenburg Region            | 0.5          | 0.0000  | Sevastopol            | 0.7          | 0.0005  |
| Jewish Autonomous Region     | 0.9          | 0.6978  | Oryol Region               | 0.7          | 0.0001  | Smolensk Region       | 0.6          | 0.0000  |
| Trans-Baikal Territory       | 0.8          | 0.5744  | Penza Region               | 0.6          | 0.0000  | Stavropol Territory   | 0.8          | 0.0000  |
| Ivanovo Region               | 0.5          | 0.0002  | Perm Territory             | 0.3          | 0.0000  | Tambov Region         | 0.5          | 0.0000  |
| Irkutsk Region               | 0.4          | 0.0035  | Primorsky Territory        | 0.7          | 0.0003  | Tver Region           | 0.8          | 0.0000  |
| Kabardino-Balkarian Republic | 0.7          | 0.3613  | Pskov Region               | 0.8          | 0.7701  | Tomsk Region          | 0.8          | 0.0211  |
| Kaliningrad Region           | 0.7          | 0.0092  | Republic of Adygea         | 0.9          | 0.4181  | Tula Region           | 0.7          | 0.0000  |
| Kaluga Region                | 0.7          | 0.0000  | Republic of Altai          | 0.6          | 0.0000  | Tyumen Region         | 0.3          | 0.8636  |
| Kamchatka Territory          | 0.8          | 0.6483  | Republic of Bashkortostan  | 0.2          | 0.0000  | Republic of Udmurtia  | 0.3          | 0.0000  |
| Karachay-Cherkess Republic   | 0.6          | 0.0000  | Republic of Buryatia       | 0.7          | 0.7604  | Ulyanovsk Region      | 0.6          | 0.0004  |
| Kemerovo Region              | 0.7          | 0.0000  | Republic of Dagestan       | -0.2         | 0.0010  | Khabarovsk Territory  | 0.6          | 0.3335  |

|                       |     |        |                                  |     |        |                                  |     |        |
|-----------------------|-----|--------|----------------------------------|-----|--------|----------------------------------|-----|--------|
| Kirov Region          | 0.6 | 0.0000 | Republic of Ingushetia           | 0.3 | 0.0000 | Khanty-Mansi Autonomous Area     | 0.6 | 0.0000 |
| Kostroma Region       | 0.8 | 0.0000 | Republic of Kalmykia             | 0.8 | 0.0000 | Chelyabinsk Region               | 0.1 | 0.0000 |
| Krasnodar Territory   | 0.7 | 0.0000 | Republic of Karelia              | 0.9 | 0.0160 | Chechen Republic                 | 0.2 | 0.5552 |
| Krasnoyarsk Territory | 0.6 | 0.0001 | Komi Republic                    | 0.8 | 0.6031 | Chuvash Republic                 | 0.5 | 0.0000 |
| Republic of Crimea    | 0.8 | 0.0000 | Mari El Republic                 | 0.6 | 0.0000 | Chukotka Autonomous District     | 0.4 | 0.0005 |
| Kurgan Region         | 0.5 | 0.0015 | Republic of Mordovia             | 0.7 | 0.0000 | Yamal-Nenets Autonomous District | 0.7 | 0.0071 |
| Kursk Region          | 0.6 | 0.0000 | Republic of Sakha (Yakutia)      | 0.7 | 0.0010 | Yaroslavl Region                 | 0.7 | 0.0000 |
| Leningrad Region      | 0.7 | 0.0000 | Republic of North Ossetia-Alania | 0.7 | 0.0002 |                                  |     |        |
| Lipetsk Region        | 0.3 | 0.0000 | Republic of Tatarstan            | 0.1 | 0.0000 |                                  |     |        |
