# Supplementary material for: Online queries as a criterion for evaluation of the epidemiological status and effectiveness of COVID-19 epidemic control measures
Source: bioRxiv or medRxiv preprint supplement (doi:10.1101/2021.07.11.21260148), 2021-07-14
Supplement: Supplementary file [file media-3.pdf]

**Supplementary Table 3. Weekly change in the increased number of online smell-related queries and the increased number of new cases of COVID-19**

| Region of Russian Federation | The beginning of the increase in the number of queries (week) | The beginning of the increase in the number of new cases of infection (week) | Change (weekly) | The beginning of the increase in the number of queries (week) | The beginning of the increase in the number of new cases of infection (week) | Change (weekly) |
|------------------------------|---------------------------------------------------------------|------------------------------------------------------------------------------|-----------------|---------------------------------------------------------------|------------------------------------------------------------------------------|-----------------|
| Altai Territory              | -----                                                         | -----                                                                        | -----           | 35                                                            | 36                                                                           | 1               |
| Amursk Region                | -----                                                         | 18                                                                           | -----           | 34                                                            | 35                                                                           | 1               |
| Arkhangelsk Region           | 14                                                            | 15                                                                           | 1               | 34                                                            | 35                                                                           | 1               |
| Bryansk Region               | 15                                                            | 15                                                                           | -----           | 35                                                            | 35                                                                           | -----           |
| Vladimir Region              | 13                                                            | 14                                                                           | 2               | 38                                                            | 40                                                                           | 2               |
| Volgograd Region             | 15                                                            | 17                                                                           | 2               | 36                                                            | 39                                                                           | 3               |
| Voronezh Region              | 15                                                            | 16                                                                           | 1               | 34                                                            | 37                                                                           | 3               |
| Ivanovo Region               | 15                                                            | 15                                                                           | -----           | 38                                                            | 40                                                                           | 2               |
| Kaliningrad Region           | -----                                                         | 15                                                                           | -----           | 36                                                            | 37                                                                           | 1               |
| Kaluga Region                | 16                                                            | 14                                                                           | 2               | 38                                                            | 38                                                                           | -----           |
| Karachay-Cherkess Republic   | 13                                                            | 15                                                                           | 2               | 33                                                            | 33                                                                           | -----           |
| Kemerovo Territory           | -----                                                         | 22                                                                           | -----           | 36                                                            | 38                                                                           | 2               |
| Kirov Region                 | -----                                                         | 21                                                                           | -----           | 37                                                            | 40                                                                           | 3               |
| Kostroma Region              | 14                                                            | 14                                                                           | -----           | 39                                                            | 36                                                                           | 3               |
| Krasnodar Territory          | 14                                                            | 15                                                                           | 1               | 36                                                            | 39                                                                           | 3               |
| Krasnoyarsk Territory        | 14                                                            | 15                                                                           | 1               | 38                                                            | 40                                                                           | 2               |
| Republic of Crimea           | -----                                                         | -----                                                                        | -----           | 35                                                            | 35                                                                           | -----           |
| Kurgan Region                | -----                                                         | 24                                                                           | -----           | 38                                                            | 39                                                                           | 1               |
| Kursk Region                 | 15                                                            | 20                                                                           | 5               | 38                                                            | 37                                                                           | 1               |
| Leningrad Region             | 13                                                            | 14                                                                           | 1               | 37                                                            | 36                                                                           | 1               |
| Magadan Region               | -----                                                         | 16                                                                           | -----           | 36                                                            | 37                                                                           | 1               |
| Moscow                       | 13                                                            | 14                                                                           | 1               | 37                                                            | 39                                                                           | 2               |
| Moscow Region                | 13                                                            | 8                                                                            | 5               | 36                                                            | 40                                                                           | 4               |
| Murmansk Region              | 13                                                            | 15                                                                           | -----           | 36                                                            | 38                                                                           | 2               |
| Nenets Autonomous District   | 14                                                            | 16                                                                           | 2               | 37                                                            | 39                                                                           | 2               |
| Nizhny Novgorod Region       | 15                                                            | 15                                                                           | -----           | 37                                                            | 40                                                                           | 3               |
| Novgorod Region              | 15                                                            | 16                                                                           | 1               | 37                                                            | 39                                                                           | 2               |
| Novosibirsk Region           | 15                                                            | 16                                                                           | 1               | 37                                                            | 39                                                                           | 2               |
| Omsk Region                  | 24                                                            | 24                                                                           | -----           | 37                                                            | 36                                                                           | 1               |
| Orenburg Region              | -----                                                         | 16                                                                           | -----           | 35                                                            | 37                                                                           | 2               |

|                                     |       |       |       |       |       |       |
|-------------------------------------|-------|-------|-------|-------|-------|-------|
| Oryol Region                        | 14    | 15    | 1     | 38    | 39    | 1     |
| Penza Region                        | ----- | 16    | ----- | 34    | 38    | 4     |
| Primorsky Territory                 | ----- | 16    | ----- | 37    | 41    | 4     |
| Republic of Altai                   | ----- | 17    | ----- | 37    | 38    | 1     |
| Republic of Kalmykia                | ----- | ----- | ----- | ----- | ----- | ----- |
| Republic of Karelia                 | ----- | ----- | ----- | 37    | 39    | 2     |
| Mari El Republic                    | 14    | 15    | 1     | 38    | 37    | 1     |
| Republic of Mordovia                | 15    | 15    | ----- | 38    | 39    | 1     |
| Republic of Sakha<br>(Yakutia)      | 14    | 16    | 2     | 34    | 36    | 2     |
| Republic of North<br>Ossetia-Alania | 13    | 15    | 2     | 40    | 33    | 6     |
| Republic of Tyva                    | 14    | 19    | 5     | 36    | 38    | 2     |
| Rostov Region                       | ----- | 16    | ----- | 35    | 36    | 1     |
| Ryazan Region                       | 15    | 15    | ----- | 37    | 39    | 2     |
| St. Petersburg                      | 14    | 16    | 2     | 36    | 40    | 4     |
| Saratov Region                      | ----- | 16    | ----- | 35    | 36    | 1     |
| Sakhalin Region                     | ----- | ----- | ----- | 37    | 40    | 3     |
| Sverdlovsk Region                   | ----- | 17    | ----- | 35    | 40    | 5     |
| Sevastopol                          | ----- | ----- | ----- | ----- | 41    | ----- |
| Smolensk Region                     | 15    | 16    | 1     | 37    | 39    | 2     |
| Stavropol Territory                 | 13    | 15    | 2     | 38    | 38    | ----- |
| Tambov Region                       | 15    | 15    | ----- | 37    | 38    | 1     |
| Tver Region                         | 14    | 22    | 8     | 14    | 22    | 8     |
| Tomsk Region                        | ----- | 14    | ----- | 38    | 36    | 2     |
| Tula Region                         | 14    | 15    | 1     | 37    | 38    | 1     |
| Ulyanovsk Region                    | 15    | 15    | ----- | 34    | 36    | 2     |
| Khanty-Mansi<br>Autonomous Area     | ----- | 16    | ----- | 37    | 36    | 1     |
| Chuvash Republic                    | 13    | 14    | 1     | 37    | 40    | ----- |
| Yamal-Nenets<br>Autonomous District | ----- | 24    | ----- | 37    | 38    | 1     |
| Yaroslavl Region                    | 15    | 16    | 1     | 37    | 37    | ----- |
