# Supplementary material for: Online queries as a criterion for evaluation of the epidemiological status and effectiveness of COVID-19 epidemic control measures
Source: bioRxiv or medRxiv preprint supplement (doi:10.1101/2021.07.11.21260148), 2021-07-14
Supplement: Supplementary file [file media-5.pdf]

**Supplementary Table 4. Statistics of levofloxacin-related queries in Russia**

| Region                           | New cases of infection | The number of levofloxacin-related queries | The levofloxacin queries/new infection cases ratio |
|----------------------------------|------------------------|--------------------------------------------|----------------------------------------------------|
| Moscow                           | 963941                 | 822911                                     | 0.9                                                |
| St. Petersburg                   | 360459                 | 285314                                     | 0.8                                                |
| Tver Region                      | 32688                  | 40679                                      | 1.2                                                |
| Republic of North Ossetia-Alania | 15473                  | 26417                                      | 1.7                                                |
| Leningrad Region                 | 34846                  | 44392                                      | 1.3                                                |
| Arkhangelsk Region               | 55642                  | 18857                                      | 0.3                                                |
| Novgorod Region                  | 26582                  | 17263                                      | 0.6                                                |
| Kaliningrad Region               | 27421                  | 16781                                      | 0.6                                                |
| Mari El Republic                 | 11532                  | 13497                                      | 1.2                                                |
| Altai Territory                  | 16090                  | 78015                                      | 4.8                                                |
| Stavropol Territory              | 46642                  | 103974                                     | 2.2                                                |
| Moscow Region                    | 963941                 | 400554                                     | 0.4                                                |
| Nenets Autonomous District       | 1001                   | 558                                        | 0.6                                                |
| Smolensk Region                  | 25618                  | 31091                                      | 1.2                                                |
| Bryansk Region                   | 32158                  | 51433                                      | 1.6                                                |
| Vladimir Region                  | 26509                  | 62799                                      | 2.4                                                |
| Ryazan Region                    | 23946                  | 61161                                      | 2.6                                                |
| Nizhny Novgorod Region           | 93747                  | 162097                                     | 1.7                                                |
| Krasnodar Territory              | 37301                  | 286333                                     | 7.7                                                |
| Penza Region                     | 37018                  | 56406                                      | 1.5                                                |
| Chuvash Republic                 | 21014                  | 47122                                      | 2.2                                                |
| Ulyanovsk Region                 | 46895                  | 66214                                      | 1.4                                                |
| Kaluga Region                    | 35567                  | 36908                                      | 1.0                                                |

|                              |       |        |     |
|------------------------------|-------|--------|-----|
| Kaluga Region                | 28984 | 54205  | 1.9 |
| Volgograd Region             | 47980 | 104269 | 2.2 |
| Kostroma Region              | 18120 | 16456  | 0.9 |
| Tambov Region                | 25406 | 56262  | 2.2 |
| Oryol Region                 | 29623 | 28292  | 1.0 |
| Tula Region                  | 32121 | 61625  | 1.9 |
| Yaroslavl Region             | 31751 | 39911  | 1.3 |
| Ivanovo Region               | 29864 | 28996  | 1.0 |
| Kursk Region                 | 29731 | 78557  | 2.6 |
| Khanty-Mansi Autonomous Area | 50072 | 34701  | 0.7 |
| Saratov Region               | 48057 | 149431 | 3.1 |
| Kemerovo Region              | 31169 | 82028  | 2.6 |
| Orenburg Region              | 36931 | 79134  | 2.1 |
| Amursk Region                | 20688 | 16179  | 0.8 |
| Voronezh Region              | 65749 | 122168 | 1.9 |
| Primorsky Territory          | 39688 | 34037  | 0.9 |
| Sverdlovsk Region            | 76315 | 145440 | 1.9 |
| Tomsk Region                 | 29879 | 18982  | 0.6 |
| Republic of Mordovia         | 17448 | 32854  | 1.9 |
| Krasnoyarsk Territory        | 60660 | 286333 | 4.7 |
| Novosibirsk Region           | 34917 | 176262 | 5.0 |
| Kurgan Region                | 17112 | 23857  | 1.4 |
